# Supplementary material for: CERAMIC: Case-Control Association Testing in Samples with Related Individuals, Based on Retrospective Mixed Model Analysis with Adjustment for Covariates
Source: PubMed Central journal article supplement (PMC5047592; doi:10.1371/journal.pgen.1006329), 2016-10-03
Supplement: pgen.1006329.s001.pdf [file pgen.1006329.s001.pdf]

## Supporting Information

### S1 Text

**Equivalence of Eqs. (16) and (13) with complete data.** We show that with complete data, i.e. with  $N = R = U = W$  and  $S = V = \emptyset$ , the CERAMIC statistic of Eq. (16) reduces to the CERAMIC<sub>c</sub> statistic of Eq. (13). In this case,  $\mathbf{G}_R = \mathbf{G}_Q = \mathbf{G}$ ,  $\hat{\Gamma}_W, \hat{\Sigma}_W, \hat{\mu}_W, \hat{\beta}_{W0}$ , and  $\hat{\xi}_{W0}$  are  $\hat{\Gamma}_0, \hat{\Sigma}_0, \hat{\mu}_0, \hat{\beta}_0$ , and  $\hat{\xi}_0$ , respectively,  $\mathbf{Z}_W = \mathbf{Z}$ ,  $\Phi_{RW} = \Phi_R = \Phi$ ,  $\mathbf{P}_Q = \mathbf{P} = \mathbf{M}$ ,  $n = q$ , and  $\hat{\sigma}_G^2 = \hat{\sigma}_G^2$ . It remains to show that  $\mathbf{F} = \mathbf{Z}$ . To see that this holds, first recall that we obtain  $(\hat{\beta}_0, \hat{\xi}_0)$  by solving Eqs. (3) and (4) with  $\gamma$  set to 0, and that  $\hat{\Gamma}_0, \hat{\Sigma}_0$ , and  $\hat{\mu}_0$  are  $\Gamma, \Sigma$ , and  $\mu$ , respectively, evaluated at  $(\gamma, \beta, \xi) = (0, \hat{\beta}_0, \hat{\xi}_0)$ . Then from Eq. (3), we have  $\mathbf{X}^T \mathbf{Z} = \mathbf{X}^T \hat{\Gamma}_0^{1/2} \hat{\Sigma}_0^{-1} \hat{\Gamma}_0^{-1/2} (\mathbf{Y} - \hat{\mu}_0) = 0$ . In particular, since the vector  $\mathbf{1}_n$ , of length  $n$  with every element equal to 1, is one of the columns of  $\mathbf{X}$ , this implies  $\mathbf{1}_n^T \mathbf{Z} = 0$ . Then, in the complete data case,  $\mathbf{F} = \mathbf{M} \Phi_{RW} \mathbf{Z}_W = \mathbf{P} \Phi \mathbf{Z} = (\mathbf{I} - \Phi^{-1} \mathbf{1}_n (\mathbf{1}_n^T \Phi^{-1} \mathbf{1}_n)^{-1} \mathbf{1}_n^T) \mathbf{Z} = \mathbf{Z}$ . From this, it is clear that Eq. (16) reduces to Eq. (13) in the complete data case.
