# Supplementary material for: CERAMIC: Case-Control Association Testing in Samples with Related Individuals, Based on Retrospective Mixed Model Analysis with Adjustment for Covariates
Source: PubMed Central journal article supplement (PMC5047592; doi:10.1371/journal.pgen.1006329), 2016-10-03
Supplement: pgen.1006329.s002.pdf [file pgen.1006329.s002.pdf]

## Supporting Information

### S2 Text

**Equivalence of Eqs. (16) and (20).** We show that the CERAMIC statistic of Eq. (16) can be rewritten as Eq. (20), in terms of the BLUP-imputed genotypes. It is sufficient to show that  $\mathbf{Z}_W^T \hat{\mathbf{G}}_W = \mathbf{F}^T \mathbf{G}_R$ . By a similar argument to that in S1 Text, we have that  $\mathbf{1}_w^T \mathbf{Z}_W = 0$ . By Eq. (18),  $\mathbf{Z}_W^T \hat{\mathbf{G}}_W = \mathbf{Z}_W^T [\mathbf{1}_w (\mathbf{1}_r^T \Phi_R^{-1} \mathbf{1}_r)^{-1} \mathbf{1}_r^T \Phi_R^{-1} + \Phi_{WR} \mathbf{M}] \mathbf{G}_R$ . Applying  $\mathbf{Z}_W^T \mathbf{1}_w = 0$ , we obtain  $\mathbf{Z}_W^T \hat{\mathbf{G}}_W = \mathbf{Z}_W^T \Phi_{WR} \mathbf{M} \mathbf{G}_R = \mathbf{F}^T \mathbf{G}_R$  by the definition of  $\mathbf{F}$ . From this, it is clear that the CERAMIC statistic of Eq. (16) can be rewritten as Eq. (20), in terms of the BLUP-imputed genotypes.
