# Supplementary material for: CERAMIC: Case-Control Association Testing in Samples with Related Individuals, Based on Retrospective Mixed Model Analysis with Adjustment for Covariates
Source: PubMed Central journal article supplement (PMC5047592; doi:10.1371/journal.pgen.1006329), 2016-10-03
Supplement: pgen.1006329.s004.pdf [file pgen.1006329.s004.pdf]

## Supporting Information

### S2 Table

#### Empirical Type 1 Error with Prevalence 1%.

| Complete Data or Partially Missing Data | Setting of $(\pi_a, \pi_c)$ | MQLS-LIN | MQLS-LOG | CERAMIC |
|-----------------------------------------|-----------------------------|----------|----------|---------|
| Partially Missing                       | (.2, .6)                    | .050     | .051     | .051    |
| Partially Missing                       | (.8, 0)                     | .048     | .048     | .050    |
| Complete                                | (.2, .6)                    | .050     | .052     | .051    |
| Complete                                | (.8, 0)                     | .049     | .049     | .050    |

All tests adjust for covariates. Traits are generated by the liability threshold model, where  $\pi_a$  is the proportion of total liability variance that is due to polygenic effects and  $\pi_c$  is the proportion due to covariate effects. Ascertainment setting A is used. The numbers of individuals sampled in each simulation replicate are 1200 for the scenarios with partially missing data and 600 for the scenarios with complete data. Association is tested at a non-causal SNP, which has MAF .2, and type 1 error is assessed empirically at significance level .05. Empirical type 1 error is based on 25,000 replicates. The radius of the 95% confidence interval is .0027.
