# Supplementary material for: CERAMIC: Case-Control Association Testing in Samples with Related Individuals, Based on Retrospective Mixed Model Analysis with Adjustment for Covariates
Source: PubMed Central journal article supplement (PMC5047592; doi:10.1371/journal.pgen.1006329), 2016-10-03
Supplement: pgen.1006329.s005.pdf [file pgen.1006329.s005.pdf]

## Supporting Information

### S3 Table

Empirical Type 1 Error of MQLS-LIN, MQLS-LOG, CERAMIC and GEMMA, with Partially Missing Data.

| Setting of<br>( $\pi_a, \pi_c$ ) | MQLS-LIN | MQLS-LOG | CERAMIC | GEMMA with<br>genotype imputation | GEMMA without<br>genotype imputation |
|----------------------------------|----------|----------|---------|-----------------------------------|--------------------------------------|
| (0, .8)                          | .048     | .049     | .049    | <b>.059</b>                       | <b>.032</b>                          |
| (.2, .6)                         | .050     | .050     | .050    | <b>.062</b>                       | <b>.035</b>                          |
| (.4, .4)                         | .051     | .051     | .050    | <b>.063</b>                       | <b>.032</b>                          |
| (.6, .2)                         | .050     | .050     | .051    | <b>.063</b>                       | <b>.030</b>                          |
| (.8, 0)                          | .049     | .049     | .050    | <b>.055</b>                       | <b>.032</b>                          |

All tests adjust for covariates. Traits are generated by the liability threshold model, where  $\pi_a$  is the proportion of total liability variance that is due to polygenic effects and  $\pi_c$  is the proportion due to covariate effects. Ascertainment setting A is used. The number of individuals sampled in each simulation replicate is 1200. Association is tested at a non-causal SNP, which has MAF .2, and type 1 error is assessed empirically at significance level .05. Empirical type 1 error is based on 25,000 replicates. The radius of the 95% confidence interval is .0027. Bold indicates a type 1 error rate that is outside the 95% confidence interval.
